# Supplementary material for: Distinctive dust weather intensities in North China resulted from two types of atmospheric circulation anomalies
Source: Copernicus journal article supplement (doi:10.5194/acp-25-1711-2025), 2025-02-06
Supplement: Supplementary file 1 [file acp-25-1711-2025-supplement.pdf]

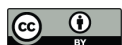

*Supplement of*

## **Distinctive dust weather intensities in North China resulted from two types of atmospheric circulation anomalies**

**Qianyi Huo et al.**

*Correspondence to:* Zhicong Yin ([yinzhc@nuist.edu.cn](mailto:yinzhc@nuist.edu.cn))

The copyright of individual parts of the supplement might differ from the article licence.

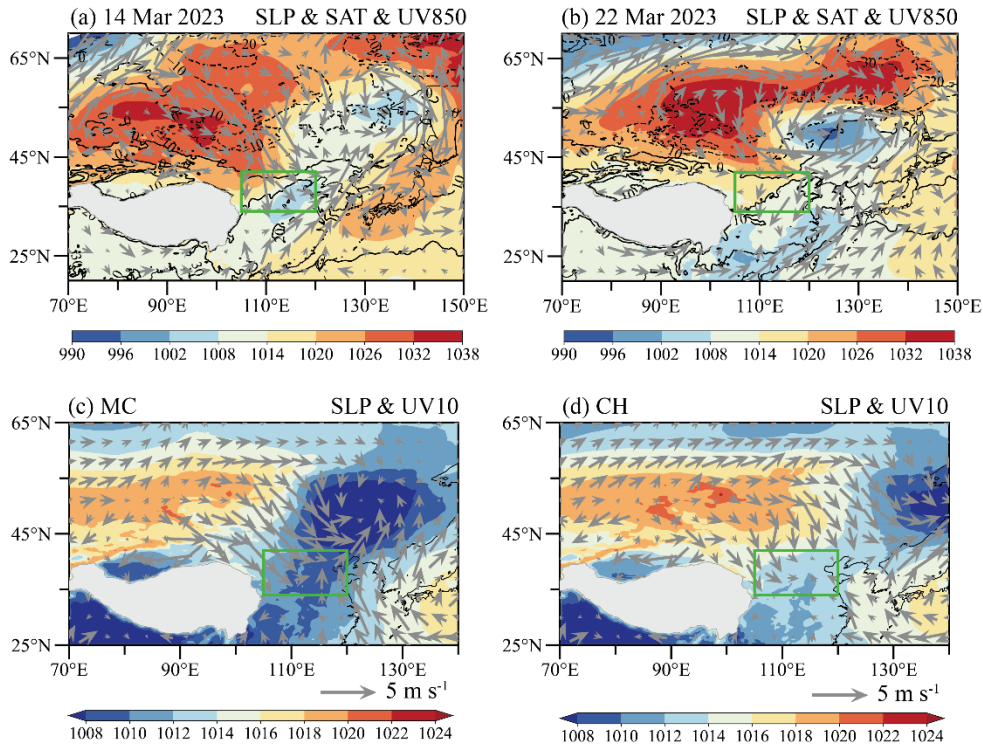

1

2 **Figure S1.** (a) SLP (shading, units: hPa), SAT (contour, units: °C) and UV850 (vectors, units:  
 3  $\text{m s}^{-1}$ ) on 14 March 2023. Panel (b) is the same as (a) but for 22 March 2023. (c) Composites  
 4 of original SLP (shading, units: hPa) and UV10 (vectors, units:  $\text{m s}^{-1}$ ) during MC days. Panel  
 5 (d) is the same as panel (c) but for CH days. The green boxes in panel (a)–(d) represent NC.

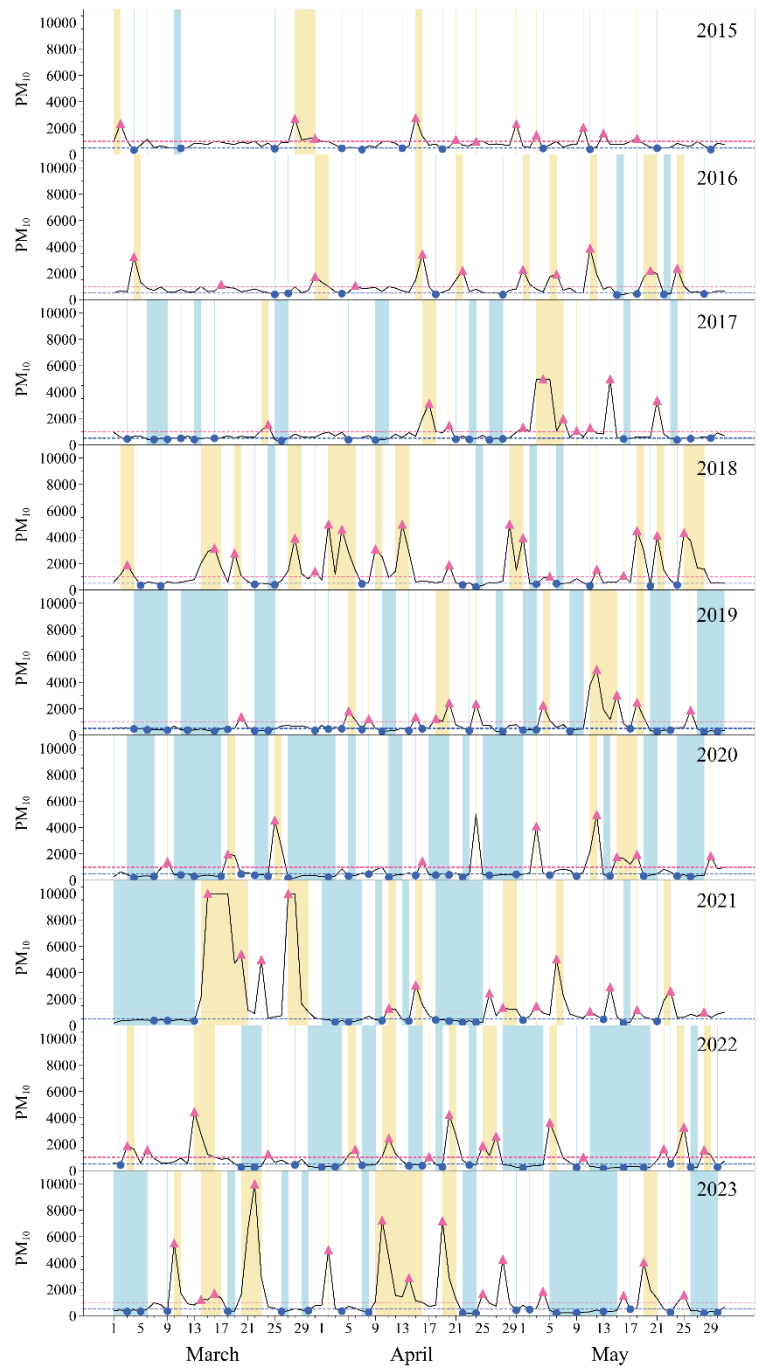

6

7 **Figure S2.** Variations of observed daily maximum  $PM_{10}$  concentrations (black lines, unit:  $\mu\text{g}$   
 8  $\text{m}^{-3}$ ). The yellow shadings represent periods of  $PM_{10}$  concentrations exceeding  $1000 \mu\text{g m}^{-3}$ ,  
 9 while the blue shadings represent periods with  $PM_{10}$  concentrations below  $500 \mu\text{g m}^{-3}$ . The  
 10 pink triangles represent the selected Dust days, while the blue dots represent the selected Non-  
 11 Dust days. Dashed lines (blue and pink) depict threshold values for  $PM_{10}$  concentration at 500  
 12 and  $1000 \mu\text{g m}^{-3}$  respectively.

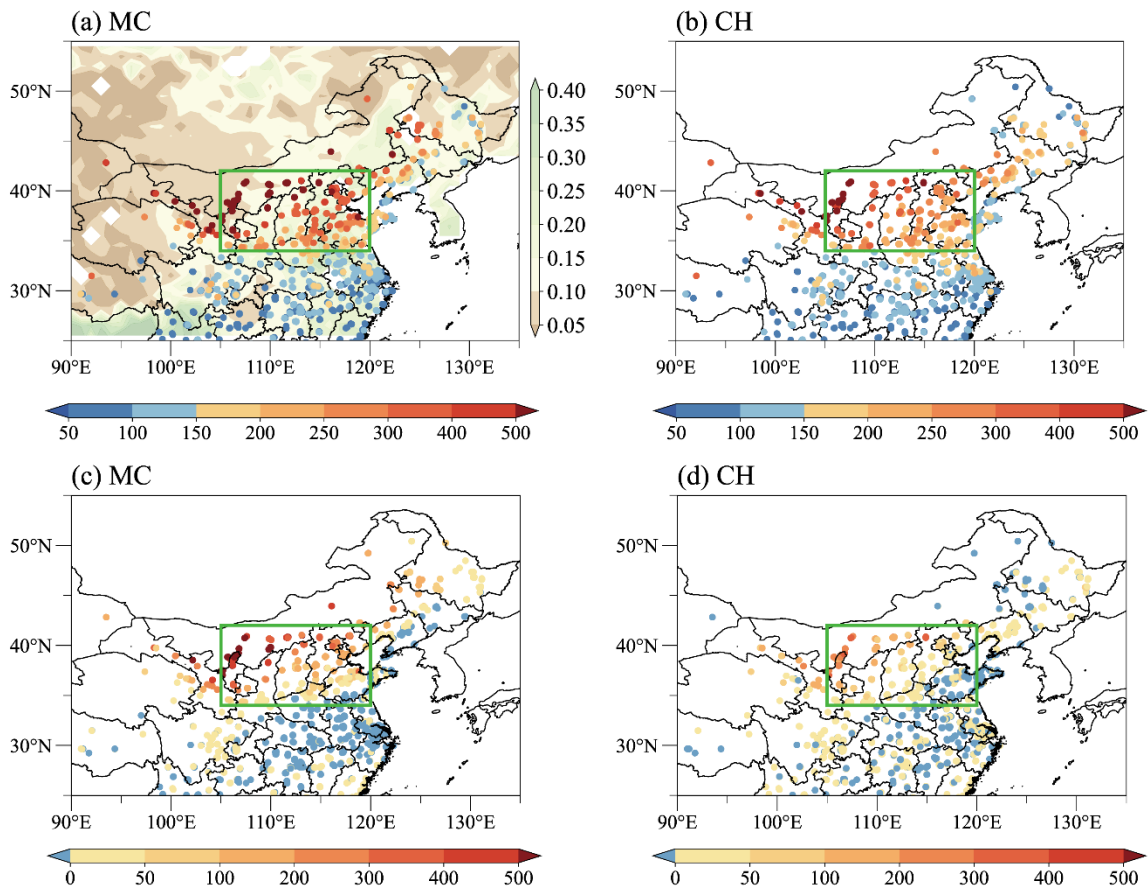

13

14 **Figure S3.** (a) Composite distribution of observed daily maximum PM<sub>10</sub> concentrations (scatter, unit:  $\mu\text{g m}^{-3}$ ) during MC days. Panel (b) is the same as (a) but for CH days. The shading in  
 15 panel (a) indicates NDVI in March 2023. (c) Composite distribution of observed daily  
 16 maximum PM<sub>10</sub> concentrations anomalies (scatter, unit:  $\mu\text{g m}^{-3}$ ) during MC days. Panel (d) is  
 17 the same as (c) but for CH days. The green boxes in panel (a)–(d) represent NC.  
 18

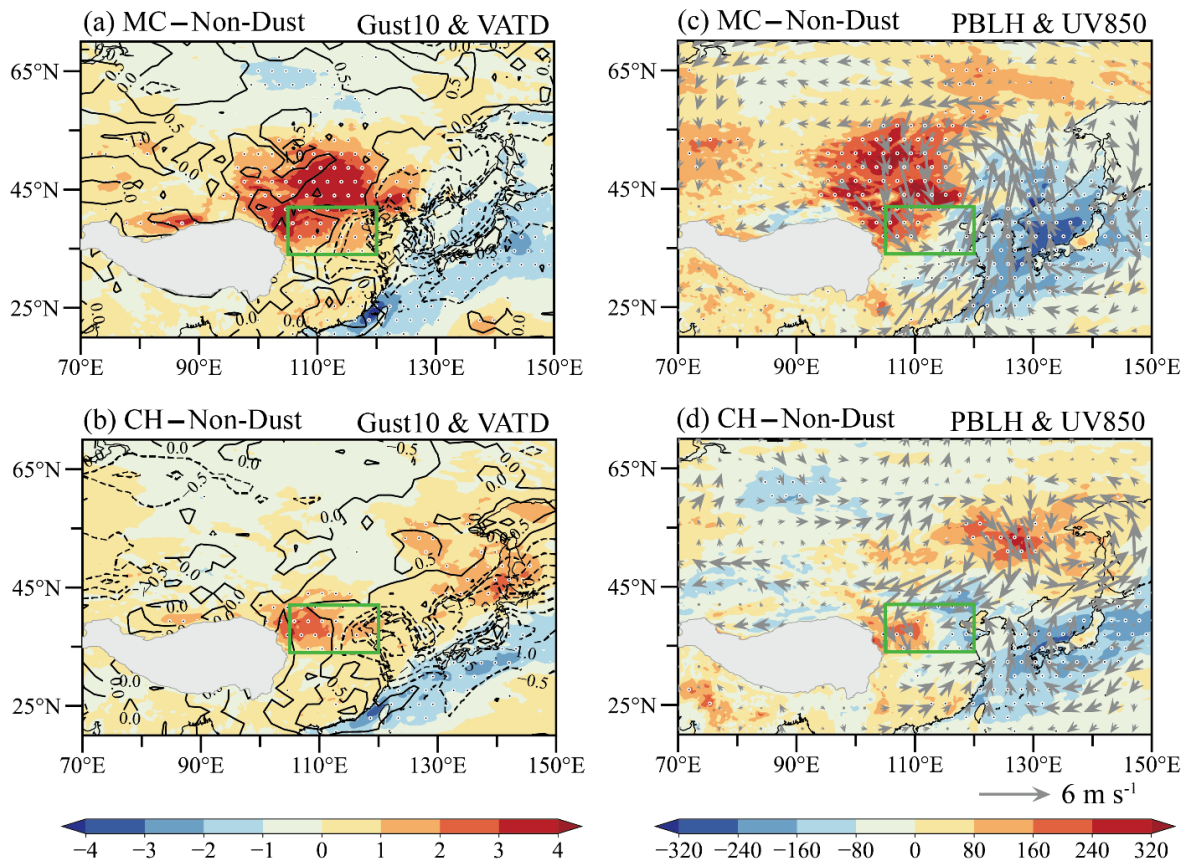

19  
 20 **Figure S4.** (a) Composite differences of Gust10 (shading, units:  $\text{m s}^{-1}$ ) and VATD (contour,  
 21 units: K) during MC days relative to Non-Dust days. White dots indicate that the differences of  
 22 Gust10 exceed the 95% confidence level. Panel (b) is the same as panel (a) but for CH days. (c)  
 23 Composite differences of PBLH (shading, units: m) during MC days relative to Non-Dust days  
 24 and composite anomalies of UV850 (vectors, units:  $\text{m s}^{-1}$ ). White dots indicate that the  
 25 differences of PBLH exceed the 95% confidence level. Panel (d) is the same as panel (c) but  
 26 for CH days. The green boxes in panel (a)–(d) represent NC.

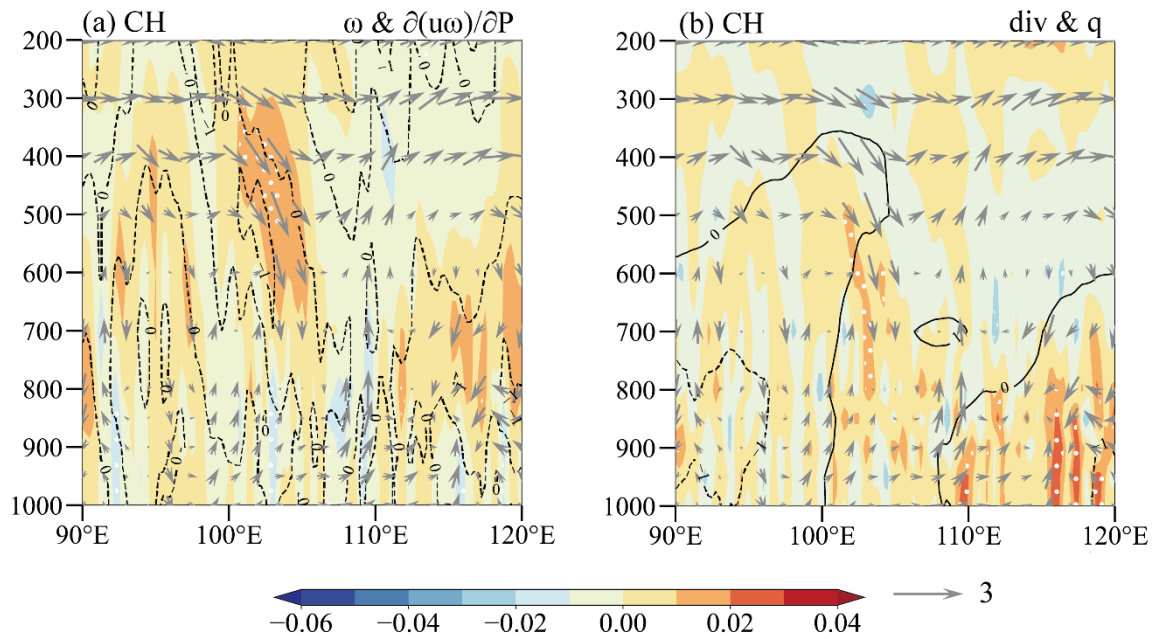

27

28 **Figure S5.** Composite anomalies of zonal component of the vertical circulation average over  
 29 40–60°N, 90–120°E during CH days: (a) The variables include  $\omega$  (shading, units:  $\text{Pa s}^{-1}$ ) and  
 30 downward transport of westerly momentum ( $<0$ , dashed contour, units:  $10^{-3} \text{ m s}^{-2}$ ). White dots  
 31 indicate that  $\omega$  anomalies exceed the 95% confidence level. The vectors represent  $\omega$  (magnified  
 32 100 times) and zonal wind. (b) The variables include divergence (shading, units:  $10^{-5} \text{ s}^{-1}$ ) and  
 33  $q$  (contour, units:  $10^{-4} \text{ kg kg}^{-1}$ ). White dots indicate that divergence anomalies exceed the 95%  
 34 confidence level. The vectors represent  $\omega$  (magnified 100 times) and zonal wind.

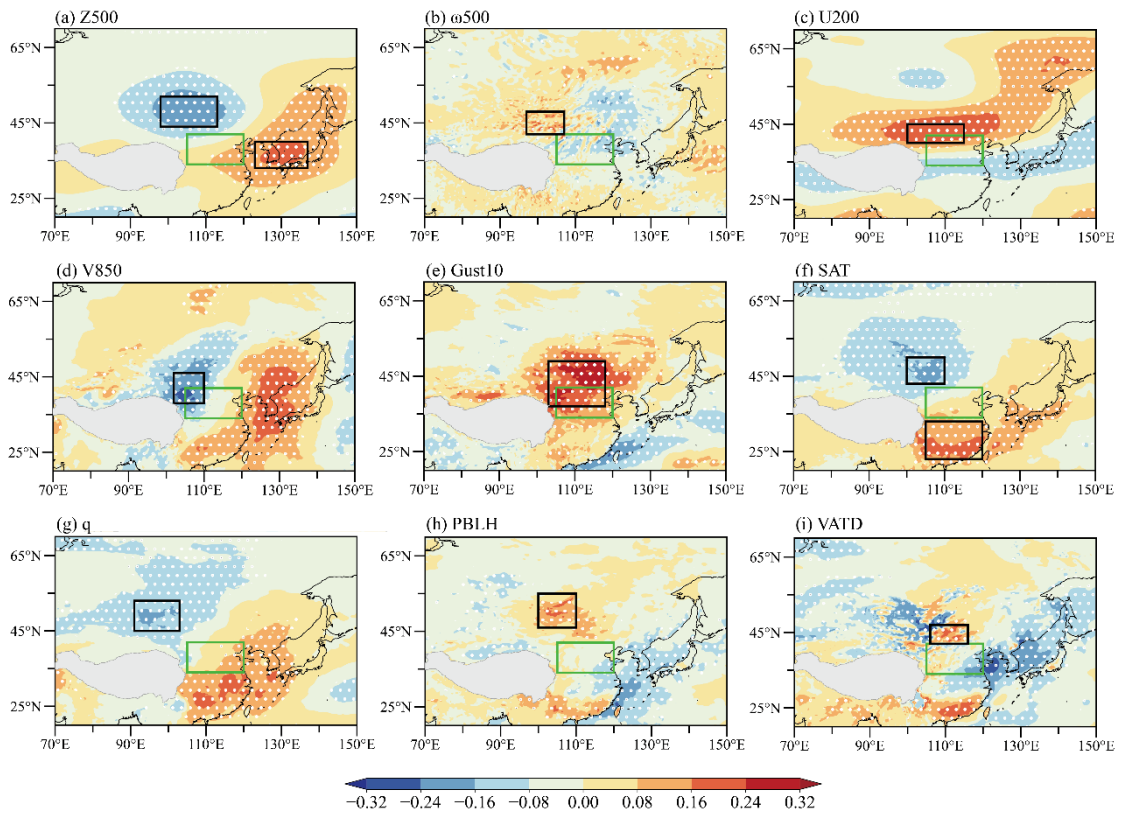

35

36 **Figure S6.** Correlation coefficients of observed daily maximum  $PM_{10}$  concentrations over NC  
 37 with daily (a) Z500, (b)  $\omega_{500}$ , (c) U200, (d) V850, (e) Gust10, (f) SAT, (g) q, (h) PBLH, and (i)  
 38 VATD in spring from 2015 to 2023. White dots indicate that correlation coefficients exceeded the  
 39 95% confidence level. The green boxes in panel (a)–(i) represent NC. The black boxes in panel  
 40 (a)–(i) represent the regions for calculating the indices in Table 1 respectively.

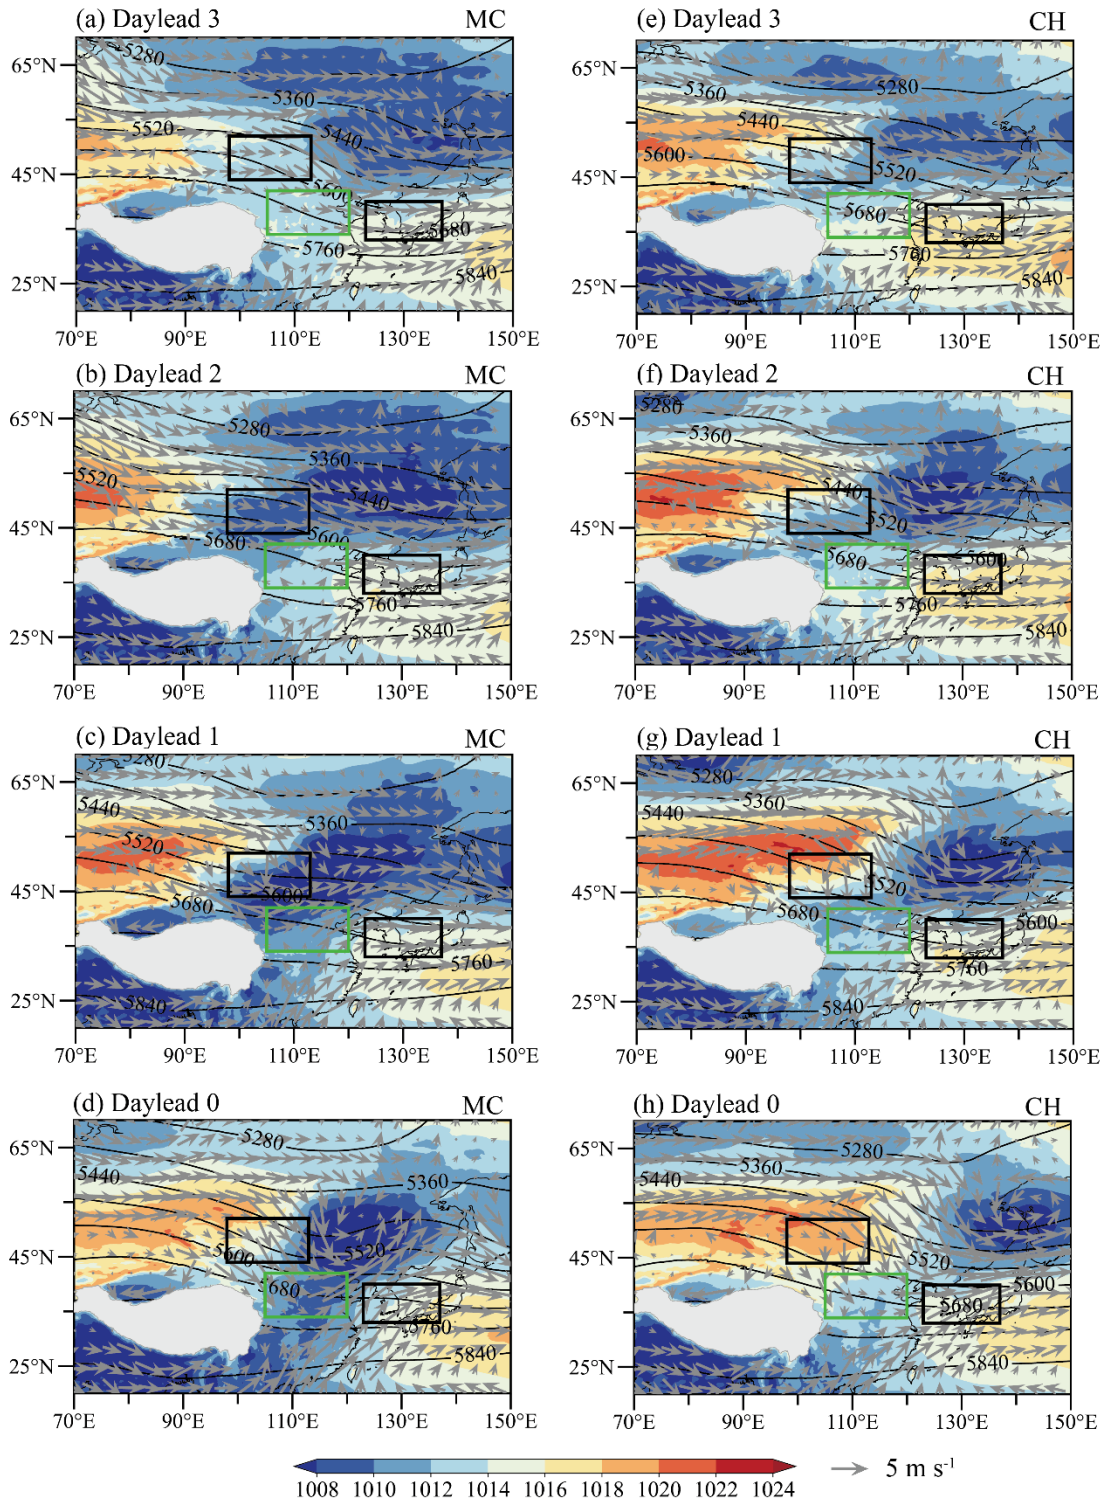

41

42 **Figure S7.** (a)–(d) Lead composite evolution of original Z500 (contour, unit: gpm), SLP  
 43 (shading, unit: hPa), and UV850 (vectors, units:  $\text{m s}^{-1}$ ) during MC days. Panel (e)–(h) are the  
 44 same as panel (a)–(d) but for CH days. The green boxes in panel (a)–(h) represent NC, while  
 45 the black boxes represent the region for calculating  $I_{\text{ACA-CA}}$ .
